# Supplementary material for: Habitat Risk Assessment of Himalayan Salamander Breeding Sites in the Darjeeling Hills
Source: Research Square preprint supplement (doi:10.21203/rs.3.rs-5544095/v1), 2025-02-05
Supplement: Supplementary file 1 [file 499fc41b59ca813429e7fffa.docx]

| Location ID | Name of the location | Longitude | Latitude | Altitude  (In masl) |
| --- | --- | --- | --- | --- |
| 1 | Margaret’s Hope tea Estate, Sonada, Darjeeling | 88.27838889 | 26.94383333 | 1577 |
| 2 | 9th mile, Simdhap, Mirik, Darjeeling | 88.15530556 | 26.91002778 | 1708 |
| 3 | Middle Chhabishey, Mirik, Darjeeling | 88.14127778 | 26.92652778 | 1961 |
| 4 | Nakapani, Mirik, Darjeeling | 88.15011111 | 26.91547222 | 1775 |
| 5 | Okaity, Mirik, Darjeeling | 88.15647222 | 26.90691667 | 1692 |
| 6 | Pokhritar, Kurseong | 88.32863889 | 26.92616667 | 1974 |
| 7 | Kaylagudam, Kurseong | 88.32394444 | 26.93138889 | 1816 |
| 8 | Namthing Pokhri, Kurseong | 88.39791667 | 26.92783333 | 1404 |
| 9 | Chimney, 6th Mile, Kurseong | 88.31005556 | 26.92069444 | 2100 |
| 10 | Chimney, School Ground, Kurseong | 88.30847222 | 26.91577778 | 2043 |
| 11 | Chimney, Kurseong | 88.31077778 | 26.92155556 | 2105 |
| 12 | Okaity TE, Mirik, Darjeeling | 88.15069444 | 26.90083333 | 1586 |
| 13 | Fuldhan Golai, Mirik, Darjeeling | 88.23944444 | 26.90563889 | 1658 |
| 14 | Mirik Municipality ward no. 8, Darjeeling | 88.17866667 | 26.89038889 | 1589 |
| 15 | Mahindragaon, Mirik, Darjeeling | 88.17847222 | 26.89130556 | 1598 |
| 16 | Raidhap, Mirik, Darjeeling | 88.19055556 | 26.88186111 | 1630 |
| 17 | Aquarium, Mirik, Darjeeling | 88.20583333 | 26.88988889 | 1600 |
| 18 | Beruidhara, Mirik, Darjeeling | 88.18555556 | 26.89091667 | 1588 |
| 19 | Naribhawan, Darjeeling | 88.18944444 | 26.88125 | 1584 |
| 20 | Ninglay, Beech gaon, Darjeeling | 88.16325 | 26.90888889 | 1591 |
| 21 | Ningalay Fatak, Mirik, Darjeeling | 88.16519444 | 26.91638889 | 1567 |
| 22 | Tiffin Dara, Pokhriabong, Darjeeling | 88.16655556 | 26.96086111 | 1867 |
| 23 | Panihas, Pokhriabong, Darjeeling | 88.17047222 | 26.95911111 | 1856 |
| 24 | Pokhriabong Basty, No. 2, Darjeeling | 88.17394444 | 26.96558333 | 1624 |
| 25 | Sumria Paani Toplinel, Pokhriabong, Darjeeling | 88.18788889 | 26.94852778 | 1710 |
| 26 | Sangma TE, Pokhriabong, Darjeeling | 88.185 | 26.94372222 | 1725 |
| 27 | Majhidhura Forest Village, Darjeeling | 88.17322222 | 27.0045 | 2075 |
| 28 | Shanu Pokhri, Dundungay Dara, Darjeeling | 88.1795 | 27.01175 | 2251 |
| 29 | Thulo Pokhri 1, Dundungay Dara, Darjeeling | 88.18616667 | 27.01361111 | 2297 |
| 30 | Thulo Pokhri Main, Dundugay Dara, Darjeeling | 88.18555556 | 27.01338889 | 2317 |
| 31 | Torzan, Gairi Gaon, Pokhriabong, Darjeeling | 88.17602778 | 26.95805556 | 2311 |
| 32 | Sumria Paani Topline2, Pokhriabong, Darjeeling | 88.18825 | 26.94675 | 1693 |
| 33 | Chhattakpur, Iohnsonnata, Darjeeling | 88.27933333 | 26.96566667 | 2166 |
| 34 | Chhattakpur Lake, Darjeeling | 88.31438889 | 26.96663889 | 2265 |
| 35 | Panchpokhri, Kurseong | 88.38113889 | 26.91597222 | 1479 |
| 36 | Chhabbishey, Mirik, Darjeeling | 88.14491667 | 26.92375 | 1926 |
| 37 | Mechhikhola, Mirik, Darjeeling | 88.14502778 | 26.92172222 | 1863 |

**Supplementary Table 1: Salamander Habitat Location in Darjeeling District – Location ID Mapped with Fig 1.**
